# Supplementary material for: A two-dimensional MXene-supported metal–organic framework for highly selective ambient electrocatalytic nitrogen reduction
Source: Royal Society of Chemistry journal article supplement (doi:10.1039/d0nr08744k), 2021-01-01
Supplement: d0nr08744k1.pdf [file d0nr08744k1.pdf]

## Supporting information

### **A two-dimensional MXene-supported metal-organic framework for highly selective ambient electrocatalytic nitrogen reduction**

Xingyou Liang<sup>a</sup>, Xuefeng Ren<sup>b,\*</sup>, Qiyue Yang<sup>a</sup>, Liguo Gao<sup>a</sup>, Mengfan Gao<sup>a</sup>, Yanan  
Yang<sup>a</sup>, Haiding Zhu<sup>a</sup>, Guangxin Li<sup>a</sup>, Tingli Ma<sup>c,d</sup>, Anmin Liu<sup>a,\*</sup>

<sup>a</sup> State Key Laboratory of Fine Chemicals, School of Chemical Engineering, Dalian University of Technology, China.

E-mail: [liuanmin@dlut.edu.cn](mailto:liuanmin@dlut.edu.cn), [anmin0127@163.com](mailto:anmin0127@163.com)

<sup>b</sup> School of Ocean Science and Technology, Dalian University of Technology, Panjin, 124221, China. E-mail: [renxuefeng@dlut.edu.cn](mailto:renxuefeng@dlut.edu.cn)

<sup>c</sup> Department of Materials Science and Engineering, China Jiliang University, Hangzhou, 310018, China.

<sup>d</sup> Graduate School of Life Science and Systems Engineering, Kyushu Institute of Technology, 2-4 Hibikino, Wakamatsu, Kitakyushu, Fukuoka 808-0196, Japan.

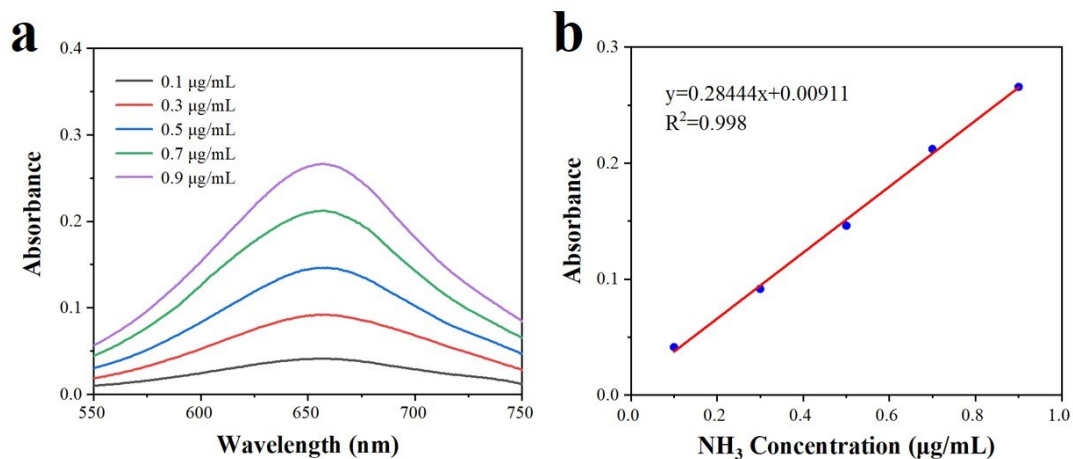

**Fig. S1** (a) Ultraviolet–visible absorption spectra of  $\text{NH}_3$  standard solutions and (b) resulting calibration curve used for the  $\text{NH}_3$  concentration.

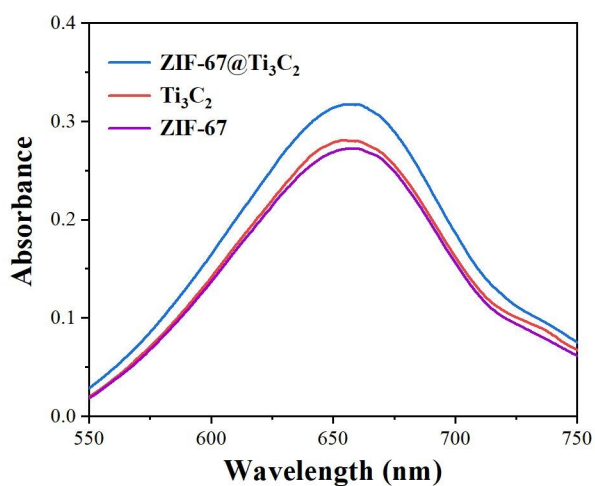

**Fig. S2** Ultraviolet–visible absorption spectra of different catalysts at  $-0.4$  V (vs. the reversible hydrogen electrode).
